# Supplementary material
Source: publisher figshare collection journal article supplement (https://acs.figshare.com/ndownloader/files/5151127)
Supplement: Supplementary file 1 [file 5151127]

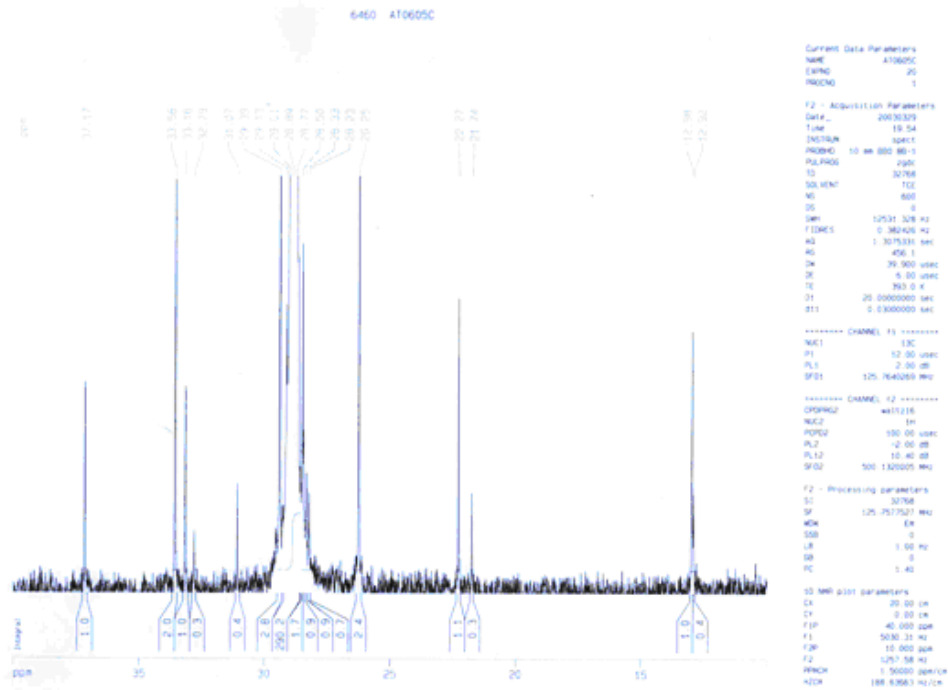

**Figure 1:**  $^{13}\text{C}$  NMR spectrum of polymer obtained from experiment P1

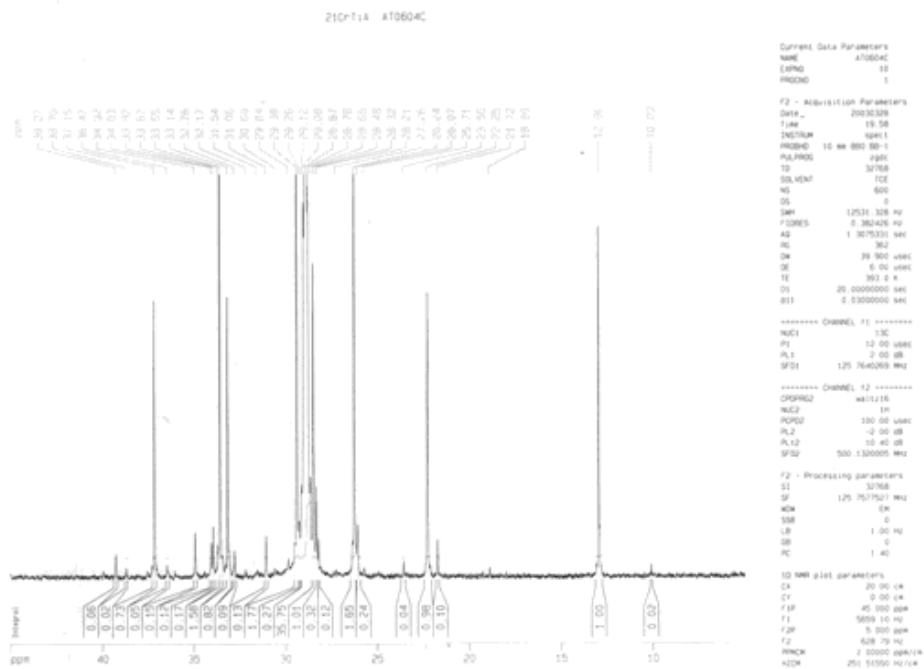

**Figure 2:**  $^{13}\text{C}$  NMR spectrum of polymer obtained from experiment P2

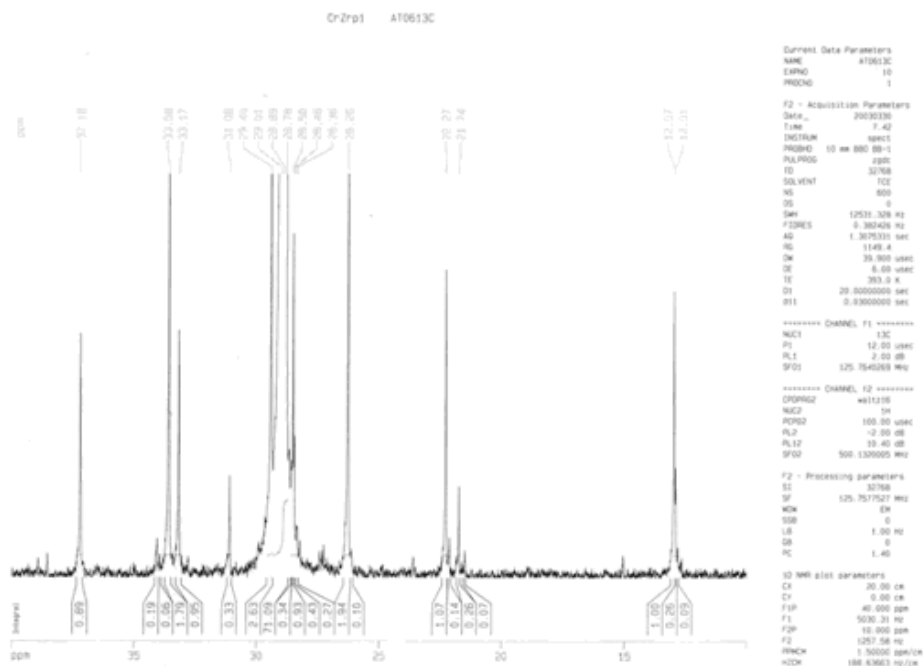

**Figure 3:**  $^{13}\text{C}$  NMR spectrum of polymer obtained from experiment P3

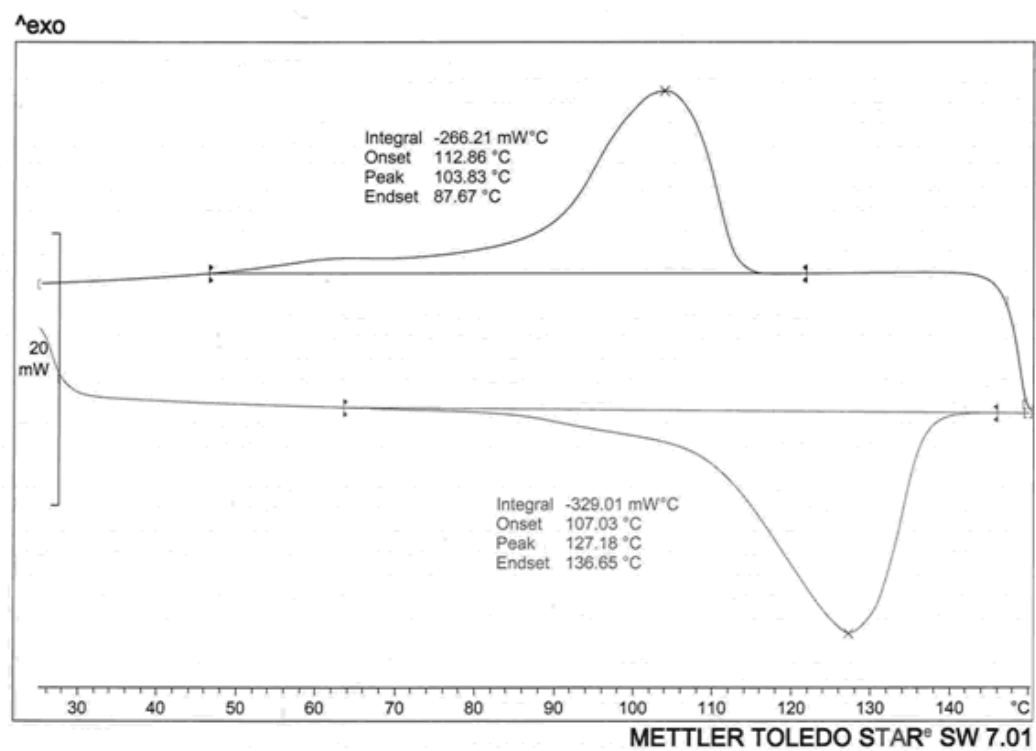

**Figure 4:** DSC thermogram of polymer obtained from experiment P1

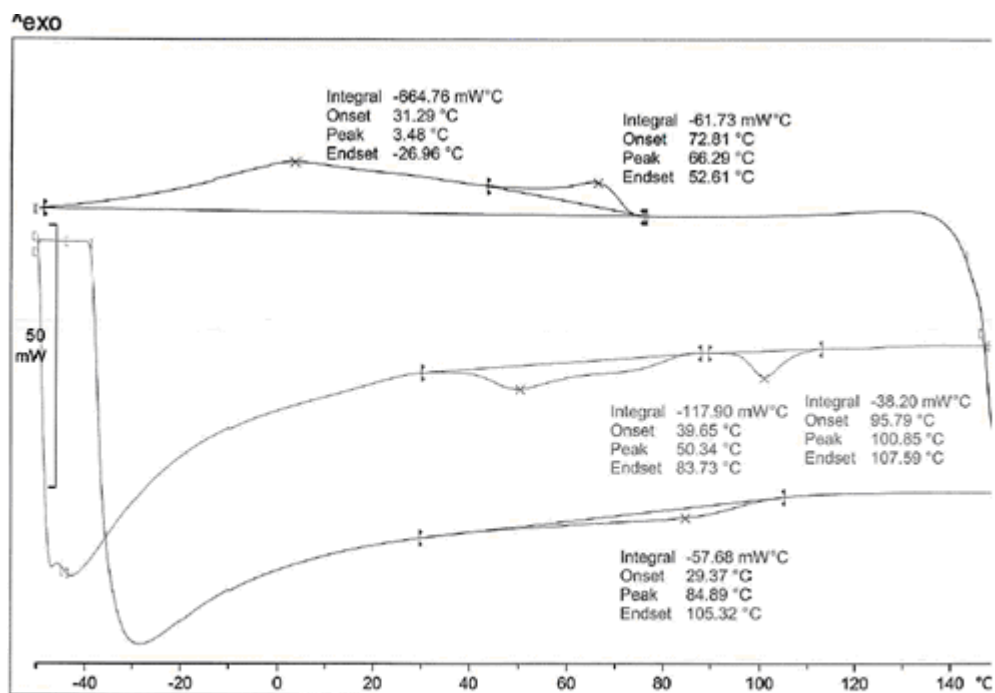

**Figure 5:**  $^{13}\text{C}$  NMR spectrum of polymer obtained from experiment P2

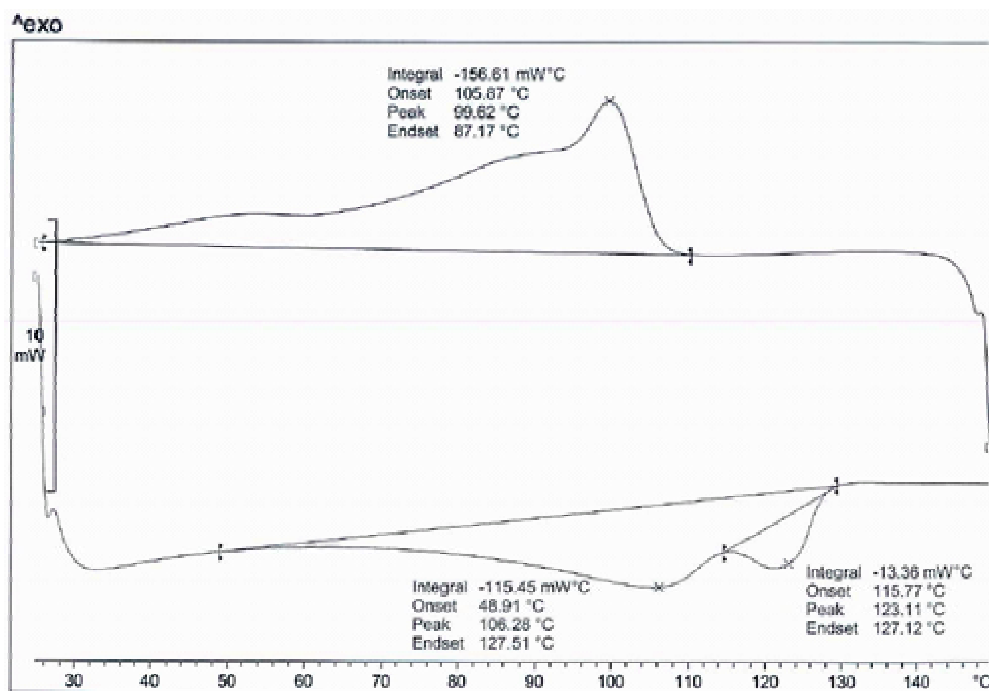

**Figure 6:**  $^{13}\text{C}$  NMR spectrum of polymer obtained from experiment P3

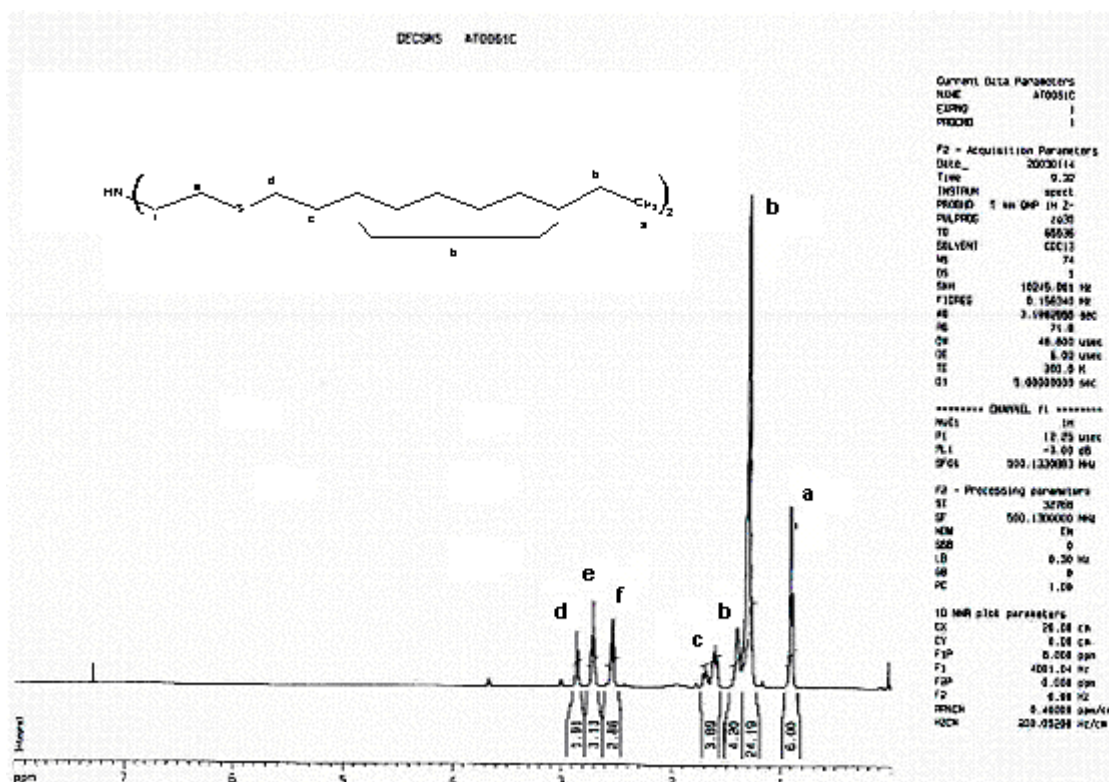

**Figure 7:**  $^1\text{H}$ -NMR spectrum of bis(2-decylthioethyl)amine.

| No. | Sample                     | %C<br>(calc) | %C<br>(calc) | %H<br>(calc) | %H<br>(calc) | %N<br>(calc) | %N<br>(calc) | %S<br>(calc) | %S<br>(calc) |
|-----|----------------------------|--------------|--------------|--------------|--------------|--------------|--------------|--------------|--------------|
| 1a  | CrCl <sub>3</sub> decylSNS | 50.03        | 49.92        | 8.92         | 9.15         | 2.43         | 2.48         | 11.13        | 10.53        |
| 1b  | CrCl <sub>3</sub> decylSNS |              | 50.01        |              | 9.18         |              | 2.49         |              | 9.34         |
| 1c  | CrCl <sub>3</sub> decylSNS |              | 48.08        |              | 8.74         |              | 2.34         |              | 10.63        |
| 1d  | CrCl <sub>3</sub> decylSNS |              | 50.55        |              | 9.12         |              | 2.46         |              | 11.01        |

**Table 1.** Elemental analysis of selected trimerization catalysts
